# Supplementary material for: CO Removal from Hydrogen Stream through Methanation on Ru/C Catalysts Doped with Lanthanum and Barium
Source: MDPI journal article supplement (doi:10.3390/hydrogen4020027), 2023-06-20
Supplement: s1 [file s1]

# Supplementary Material: CO removal from hydrogen stream through methanation on Ru/C catalysts doped with lanthanum and barium

Elżbieta Truskiewicz <sup>1,\*</sup>, Aleksandra Bielecka <sup>1</sup>, Ewa M. Iwanek (nee Wilczkowska) <sup>1</sup> and Milena Ojrzynska <sup>2</sup> and Andrzej Ostrowski <sup>1</sup>

<sup>1</sup> Faculty of Chemistry, Warsaw University of Technology, Noakowskiego 3, 00-664 Warsaw, Poland; abielecka59@gmail.com (A.B.); ewa.iwanek@pw.edu.pl (E.M.I.); andrzej.ostrowski@pw.edu.pl (A.O.)

<sup>2</sup> Faculty of Physics, Warsaw University of Technology, Koszykowa 75, 00-662 Warsaw, Poland; milena.ojrzynska@pw.edu.pl

\* Correspondence: elzbieta.truskiewicz@pw.edu.pl; Tel.: +48-22-2341786

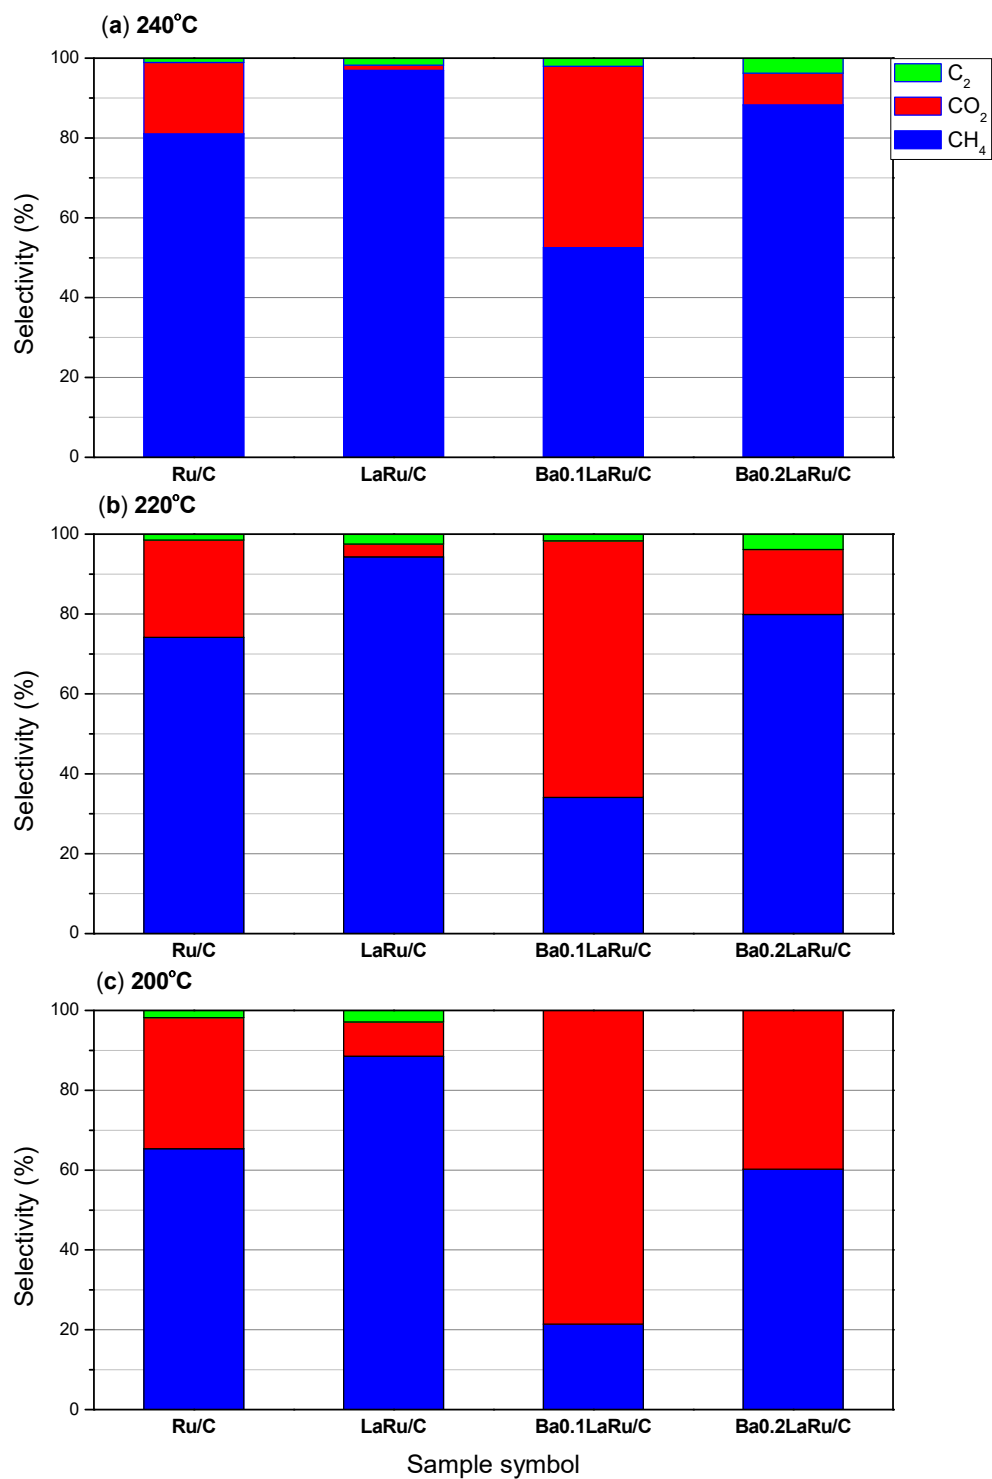

**Figure S1.** - Selectivity towards methane, carbon dioxide and C2 hydrocarbons for CO hydrogenation over the Ru- based catalysts at (a) 240°C, (b) 220°C, and (c) 200°C. Experimental conditions: mass of catalyst: 0.02 g(C+Ru); gas composition: 1 vol.% CO, 99 vol.% H<sub>2</sub>; total flow rate: 80 cm<sup>3</sup>/min.

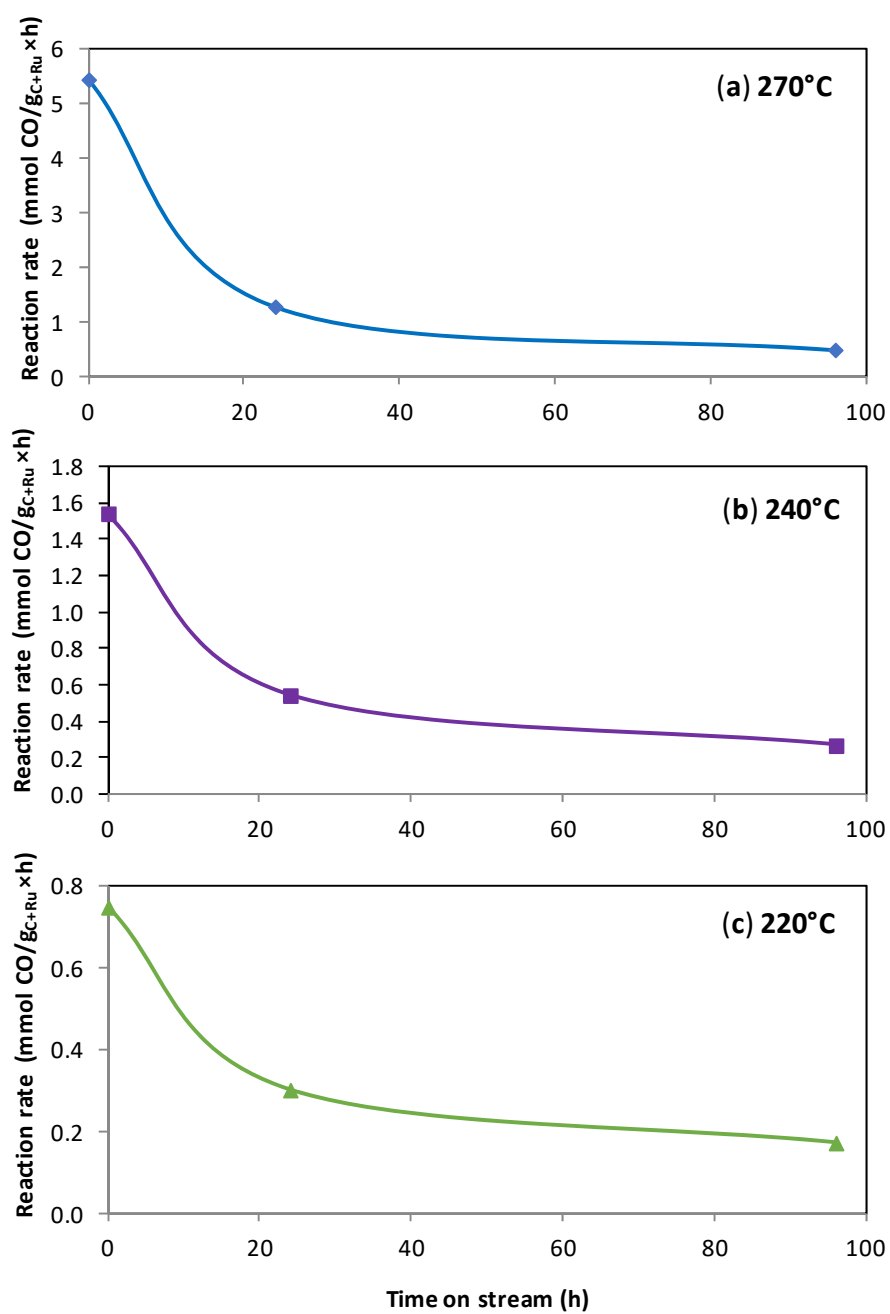

**Figure S2.** - Time on stream performance of the Ba<sub>0.1</sub>LaRu/C catalyst; measurements conditions: (a) 270°C, (b) 240°C, and (c) 220°C, 0.1 MPa, CO+H<sub>2</sub> (1:99), 80 ml/min; overheating conditions: 300°C, 0.1 MPa, CO+H<sub>2</sub> (1:99), 80 ml/min;.

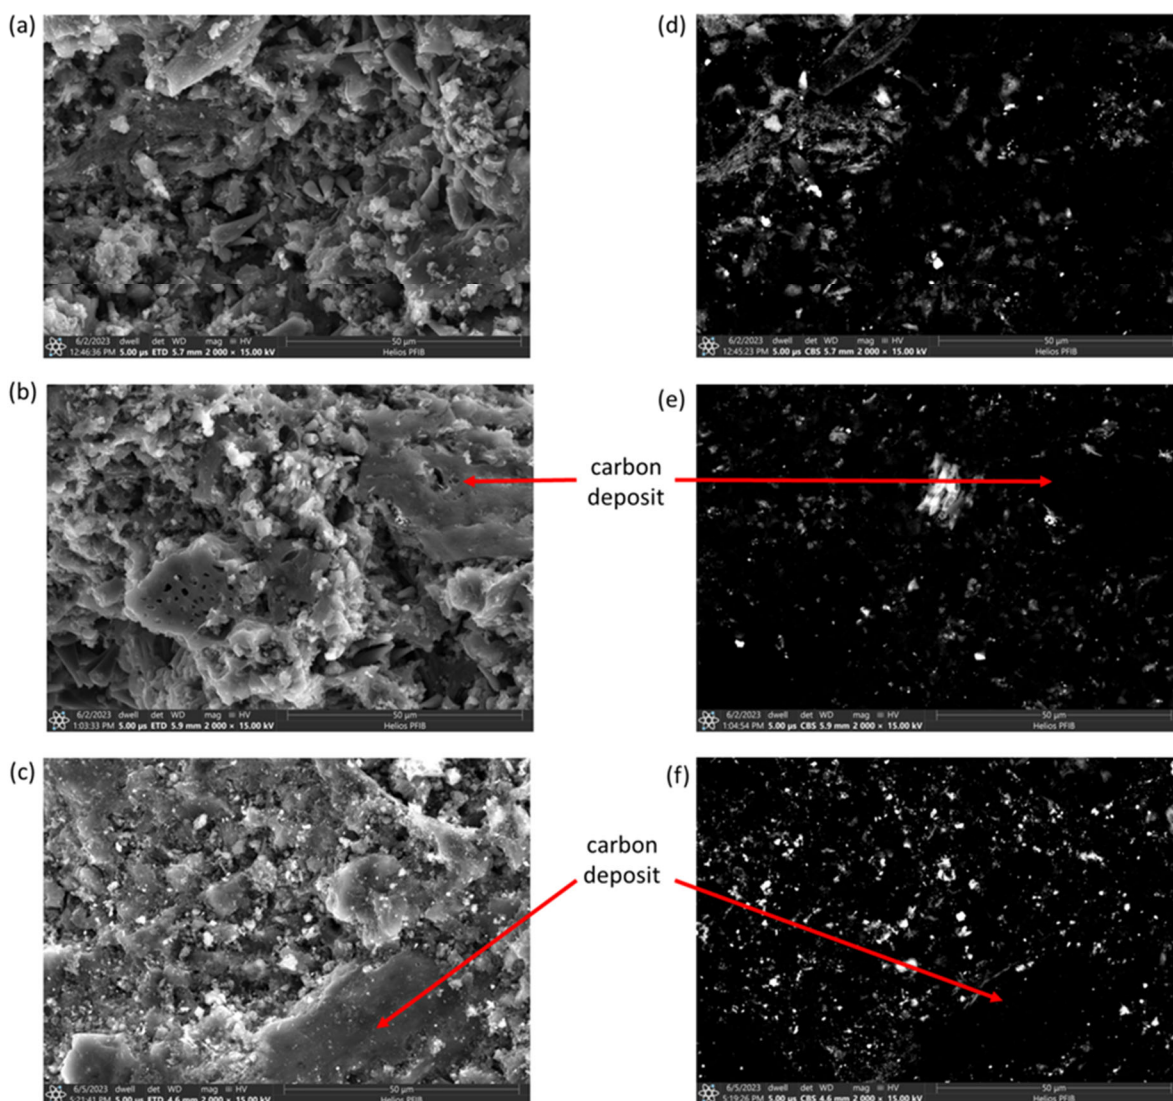

**Figure S3.** SEM results for catalysts after activity tests for the following systems: topography and backscatter images of Ba<sub>0.2</sub>LaRu/C (a,d), LaRu/C (b,e) and Ba<sub>0.1</sub>LaRu/C (c,f).
